# Supplementary material for: A spatial homojunction of titanium vacancies decorated with oxygen vacancies in TiO2 and its directed charge transfer
Source: Royal Society of Chemistry journal article supplement (doi:10.1039/d2nr03877c), 2022-01-01
Supplement: d2nr03877c1.pdf [file d2nr03877c1.pdf]

## Supporting Information

### **Spatial homojunction of titanium vacancies decorated oxygen vacancies in TiO<sub>2</sub> and its directed charge transfer**

*Si-Ming Wu, Yi-Tian Wang, Shi-Tian Xiao, Li-Ying Wang, Ge Tian, Jiang-Bo Chen, Jia-Wen Liu, Menny Shalom, and Xiao-Yu Yang\**

## Experimental Procedures

### 1. Materials

Tetrabutoxytitanium ( $\text{Ti}(\text{OC}_4\text{H}_9)_4$ , TBOT) was purchased from Aladdin. Ammonium hydroxide (25%wt), glycerol, ethanol and acetone were purchased from Shanghai Chemical Reagent Factory of China. Distilled water was used in all experiments.

### 2. Preparation of $\text{np}_x\text{-TiO}_2$ and $\text{n-TiO}_2$ .

$\text{As-TiO}_2$  was prepared by the hydrolysis of TBOT and calcination treatment according to previous work. For the synthesis of  $\text{np-TiO}_2$ , 0.2 g  $\text{As-TiO}_2$  was dispersed in the mixture of 30 mL ethanol and 10 mL glycerol. After that, x mL of TBOT was added into the mixture while stirring. The mixture was transferred into a 100 mL Teflon-lined stainless-steel autoclave and put in an oven with 180°C for 24h. The obtained product ( $\text{As-np-TiO}_2$ ) was filtrated and washed with ethanol, and then dried at 60 °C overnight. The resulting sample was calcined at 350 °C for 4 h and the heating rate to the target temperature is 1 °C/min. The obtained sample is named as  $\text{np}_x\text{-TiO}_2$ . As comparison  $\text{n-TiO}_2$  was prepared by the same procedure without the adding of TBOT.

### 2. Characterization

Scanning electron microscopy (SEM) images were taken with a Hitachi S4800 electron microscope. Electron paramagnetic resonance (EPR) measurements were performed at the X-band using a JEOL FA 2000 spectrometer, with the microwave frequency of 9.163 GHz, the modulation amplitude of 0.1 mT, the microwave power of 1 mW, and the experimental temperature of 295 K. Powder X-ray diffraction (XRD) patterns were recorded by a D8 Advance X-ray diffractometer (Bruker, Germany) with  $\text{Cu-K}\alpha$  radiation ( $\lambda = 0.15406$  nm) operated at 40 kV, 40 mA. Thermogravimetric analysis (TGA) was conducted using a NETZSCH STA 449 F3 thermogravimetric analyzer with a heating rate of 10 °C  $\text{min}^{-1}$  under air. The nitrogen adsorption and desorption isotherms of the samples were measured using a Micromeritics TriStar TM II 3020. Before the measurements, the samples were outgassed at 100 °C in vacuum for 12 h. Transmission electron microscopy (TEM) experiments were conducted on a Talos-F200S STEM/EDS electron microscope operated at 200 kV. Raman analysis was performed using a Renishaw InVia Raman spectrometer under visible excitation at 532 nm. Fourier-transform infrared (FT-IR) spectra were obtained with a Thermo Nicolet 360 spectrometer.  $^1\text{H}$  magic-angle spinning (MAS) NMR and 2D  $^1\text{H}$  DQ-SQ MAS NMR

spectra were carried out in a 1.9 mm MAS probe on a Bruker AVANCE-III 500 spectrometer with a sample spinning rate of 38 kHz, a  $^1\text{H}$   $\pi/2$  pulse length of 1.65  $\mu\text{s}$  and a recycle delay of 2 s. X-ray photoelectron spectra (XPS) of the samples were recorded on a PHI Quantera II, (ULVAC-PHI, Japan) using a monochromated Al-K $\alpha$  X-ray source. Accurate binding energies ( $\pm 0.1$  eV) were determined with respect to the position of the adventitious C 1s peak at 284.8 eV. The photoluminescence (PL) spectra were measured by a Perkin-Elmer LS55 spectrometer with an excitation wavelength of 320 nm. Ultraviolet-visible spectroscopy diffuse reflectance spectra (UV-vis DRS) were attained using a Shimadzu UV-vis spectrophotometer (UV-2550). The spectra from 200 to 800 nm were taken at room temperature in air.

### **3. Photocatalytic Experiment.**

In all the photocatalytic experiments described below, the light source is a 300 W xenon lamp (PLS-SXE-300D, Beijing Perfectlight Technology Co., Ltd.) with full light spectrum, and the incident light intensity at the location of photocatalysts was fixed to 100 mW/cm $^2$ .

*Photocatalytic degradation.* To investigate the photocatalytic activity of the nanostructured TiO $_2$  samples, methylene blue (MB) and acetone were used as model pollutants for photodegradation. For MB degradation, 20 mg photocatalysts were dispersed in 100 mL aqueous solution containing 0.01 g/L MB. After stirring for 1 h in the dark until the concentration of MB remained unchanged, the reactor was then illuminated. 2 mL supernatant was taken out with an interval time of 10 min and analysed by UV-visible spectrometry (UV2550, Shimadzu, Japan). For acetone degradation, 10 mg samples were dispersed in 1 mL ethanol/water solution (1:1 v/v) and then dropped onto a dish with a diameter of ca. 3 cm. The dish was then dried at 80  $^\circ\text{C}$  for 12 h and then cooled to room temperature before being used. After putting the photocatalysts into the reactor, 5  $\mu\text{L}$  of acetone was injected into the reactor with a micro syringe. The reactor was kept in the dark for a certain time to reach adsorption-desorption equilibrium before illumination. The analysis was conducted with a gas chromatograph (GC) (Agilent 2920B) equipped with a flame ionization detector (FID).

*Photocatalytic hydrogen production.* Photocatalytic H $_2$  production was carried out in a closed circulation system. 20 mg of photocatalysts was dispersed in 80 mL of an aqueous solution containing 50 mL distilled H $_2\text{O}$ , 30 mL methanol and 52  $\mu\text{L}$  H $_2\text{PtCl}_6$  (0.01 mol/L). The mixture solution was sealed in a quartz container, and the system was vacuumed with a vacuum pump for 10 minutes to remove the dissolved oxygen, at the same time, a continuous magnetic stirrer and cooling water were applied during the experiment. The Agilent 7890 A GC with a thermal

conductivity detector (TCD) was used for analysis of the produced H<sub>2</sub>. The simulated seawater used in photocatalytic H<sub>2</sub> production is 3.5 wt% NaCl aqueous solution.

#### **4. Photoelectrochemical Measurements.**

Photocurrent tests were carried out in a conventional three-electrode system using a Autolab PGSTAT302N electrochemical workstation (Metrohm, Switzerland) with a Pt foil as the counter electrode and a Ag/AgCl reference electrode. The working electrodes were prepared by dispersing catalysts (5 mg) and Nafion solution (100 μL, 0.5 wt%) in water/ethanol mixed solvent (1 mL, 1:1 v/v) at least 30 min of sonication to form a homogeneous ink. The working electrode was synthesized by drop-casting the above ink (80 μL) onto FTO glass with an area of 1 cm<sup>2</sup>.

#### **5. Density Functional Theory Calculations.**

The DFT calculations were carried out by using the Vienna Ab initio Simulation Package (VASP). The exchange-correlation interaction was described by generalized gradient approximation (GGA) with the Perdew–Burke–Ernzerhof (PBE) functional. The Brillouin zone was integrated with a Monkhorst–Pack 3×3×1 k-point grid and plane-wave energy cutoff of 520 eV for all calculations. Anatase (001) surfaces with O vacancy and Ti vacancy were built to form heterogeneous interface. Van der Waals (vdW) correction was adopted to describe long-range vdW interactions and dipole-dipole interaction was employed due to the asymmetric layercluster arrangement. The convergence criteria for energy and force were 10<sup>-5</sup> eV and 0.02 eV/Å, respectively.

## Results and Discussion

**Table S1.** The BET surface area, pore volume and pore diameter of n-TiO<sub>2</sub> and np-TiO<sub>2</sub>.

| Samples             | S <sub>BET</sub> [m <sup>2</sup> g <sup>-1</sup> ] | Pore volume [cm <sup>3</sup> g <sup>-1</sup> ] | Pore Diameter [nm] |
|---------------------|----------------------------------------------------|------------------------------------------------|--------------------|
| n-TiO <sub>2</sub>  | 79                                                 | 0.09                                           | 3.1                |
| np-TiO <sub>2</sub> | 59                                                 | 0.08                                           | 2.2                |

**Table S2.** Parameters of equivalent circuits for the impedance data of n-TiO<sub>2</sub> and np-TiO<sub>2</sub>.

| Samples             | R <sub>ct</sub> (Ω) | R <sub>s</sub> (Ω) | CPE (×10 <sup>-5</sup> Ω <sup>-1</sup> ) |
|---------------------|---------------------|--------------------|------------------------------------------|
| n-TiO <sub>2</sub>  | 7445                | 128                | 8.4                                      |
| np-TiO <sub>2</sub> | 1820                | 118                | 6.6                                      |

**Table S3.** Summary of the TiO<sub>2</sub>-based materials in photocatalytic water splitting.

| Photocatalyst               | Light source  | H <sub>2</sub> production rate<br>(mmol h <sup>-1</sup> g <sup>-1</sup> ) | System         | Ref.                            |
|-----------------------------|---------------|---------------------------------------------------------------------------|----------------|---------------------------------|
| 0.5 wt% Pt/TiO <sub>2</sub> | 300 W Xe lamp | 26.4                                                                      | Water/Methanol | Our work                        |
| 0.5 wt% Pt/TiO <sub>2</sub> | 300 W Xe lamp | 8.6                                                                       | Water/Methanol | [1] (Nanoscale 2020)            |
| 0.5 wt% Pt/TiO <sub>2</sub> | 300 W Xe lamp | 9.26                                                                      | Water/Methanol | [2] (ACS Catal. 2019)           |
| 0.6 wt% Pt/TiO <sub>2</sub> | 300 W Xe lamp | 8.45                                                                      | Water/Methanol | [3] (J. Catal. 2017)            |
| 1.0 wt% Pt/TiO <sub>2</sub> | 100 W Hg lamp | 1.441                                                                     | Water/Methanol | [4] (Adv. Mater. 2019)          |
| 1.0 wt% Pt/TiO <sub>2</sub> | 300 W Xe lamp | 5.827                                                                     | Water/Methanol | [5] (Energy Environ. Sci. 2018) |

**Table S4.** Corrosion potential of the bare 304 SS and 304 SS coupled with different electrodes in 3.5 wt% NaCl solution under illumination.

| Samples                             | $E_{\text{corr}}$ (mV vs. Ag/AgCl) |
|-------------------------------------|------------------------------------|
| 304 SS                              | -210                               |
| n-TiO <sub>2</sub>                  | -309                               |
| np-TiO <sub>2</sub>                 | -327                               |
| np <sub>mix</sub> -TiO <sub>2</sub> | -280                               |



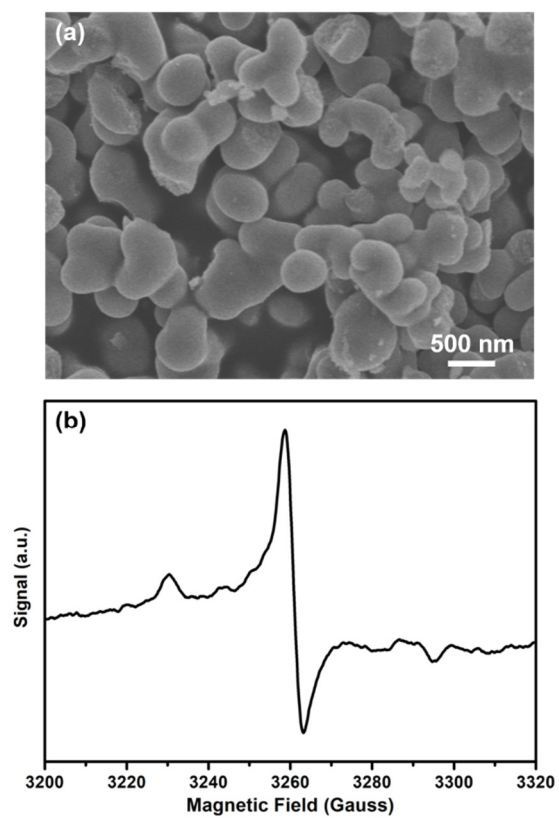

**Figure S1.** (a) SEM image of As-TiO<sub>2</sub>, (b) EPR spectrum of As-TiO<sub>2</sub>.

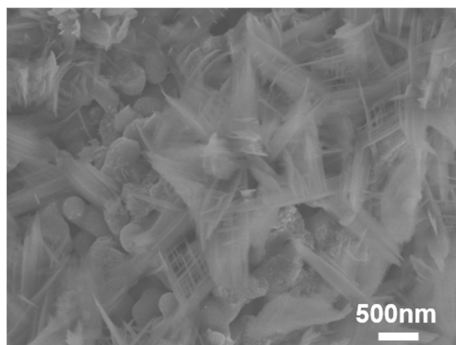

**Figure S2.** SEM image of As-np-TiO<sub>2</sub>.

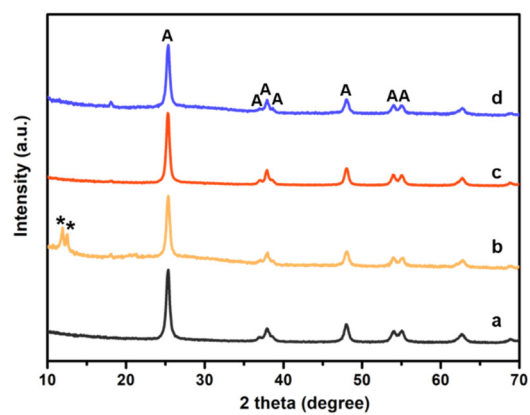

**Figure S3.** XRD patterns of a. As-TiO<sub>2</sub>, b, As-np-TiO<sub>2</sub>, c. np-TiO<sub>2</sub>, d. n-TiO<sub>2</sub>. A refers to anatase phase of TiO<sub>2</sub>, \* refers to titanium glycerolate.

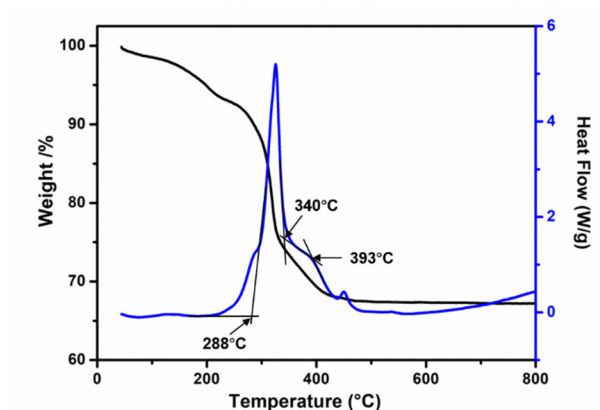

**Figure S4.** TG and DTA curves of As-np-TiO<sub>2</sub>. The weight loss of the TiO<sub>2</sub>-A before 288 °C is around 20%, which is due to the loss of absorption of water and possible hydrolysate residues of tetrabutyl titanate. 288 °C is the starting temperature for partial phase transformation of sol-gel TiO<sub>2</sub> from the amorphous phase to metastable anatase phase. The free energy of the anatase transformation is negative at least above 400 °C, which is full phase-transformation from the amorphous phase to anatase phase.

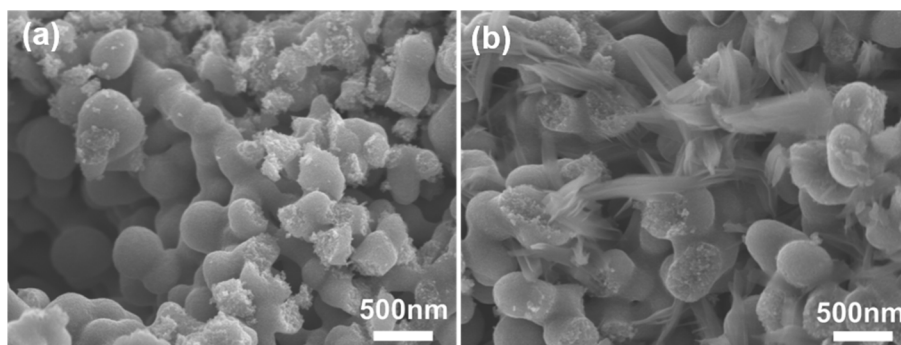

**Figure S5.** SEM images of (a) n-TiO<sub>2</sub> and (b) np-TiO<sub>2</sub>.

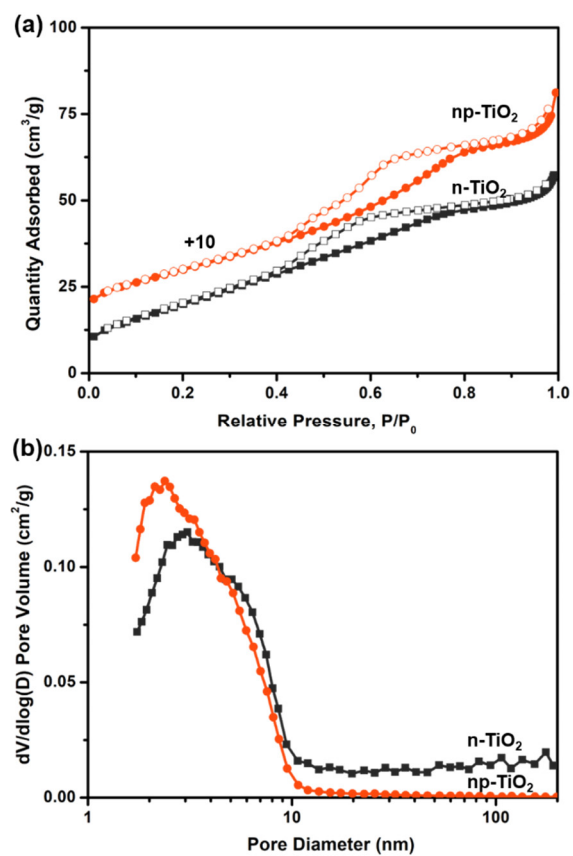

**Figure S6.** (a) Nitrogen-adsorption-desorption isotherms and (b) corresponding pore size distribution of n-TiO<sub>2</sub> and np-TiO<sub>2</sub>.

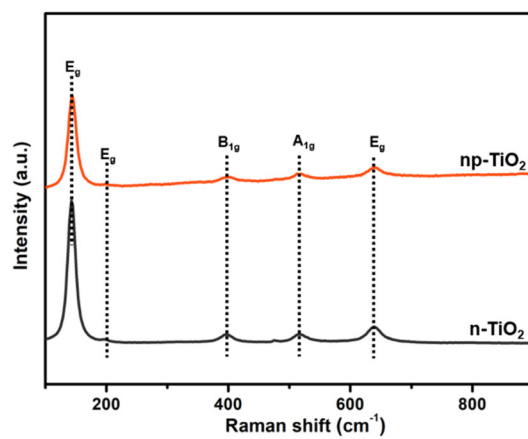

**Figure S7.** Raman spectra of n-TiO<sub>2</sub> and np-TiO<sub>2</sub>. Five peaks at 143, 195, 395, 515, and 638 cm<sup>-1</sup> could be belonged to typical anatase Raman bands of E<sub>g</sub>, E<sub>g</sub>, B<sub>1g</sub>, A<sub>1g</sub>(B<sub>1g</sub>), and E<sub>g</sub> modes, respectively.<sup>[3]</sup>

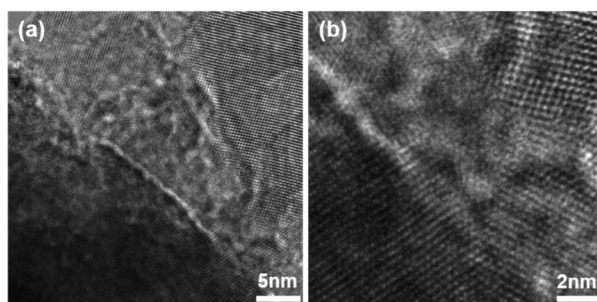

**Figure S8.** (a) Origin TEM image of Figure 1f, (b) Origin TEM image of Figure 1g.



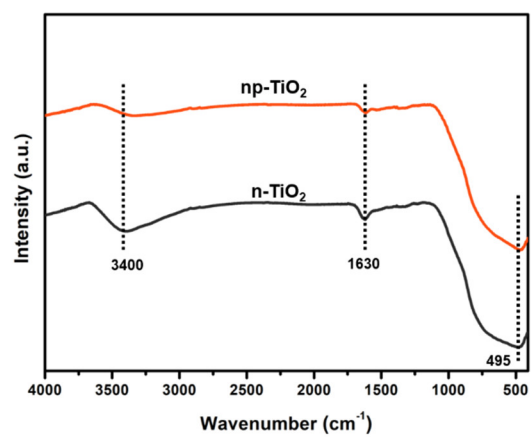

**Figure S9.** FT-IR spectra of n-TiO<sub>2</sub> and np-TiO<sub>2</sub>.

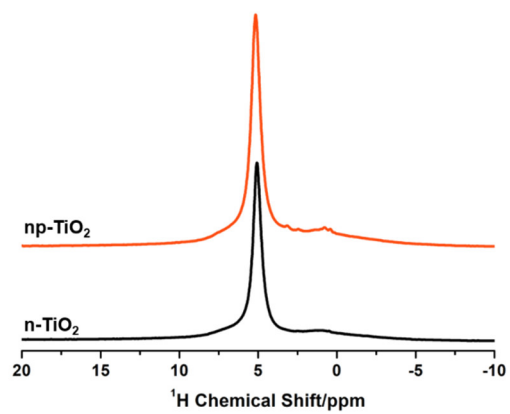

**Figure S10.**  $^1\text{H}$  NMR spectra of n-TiO<sub>2</sub> and np-TiO<sub>2</sub>.

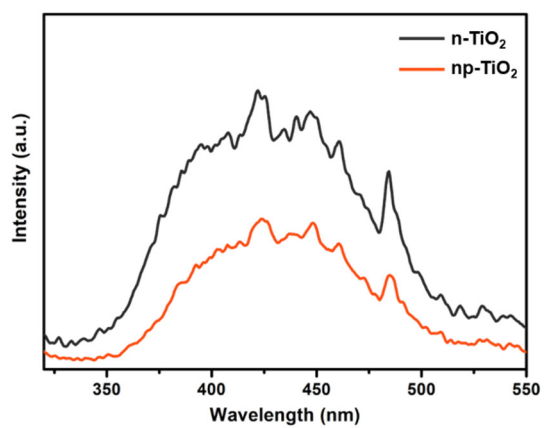

**Figure S11.** PL spectra of n-TiO<sub>2</sub> and np-TiO<sub>2</sub>.

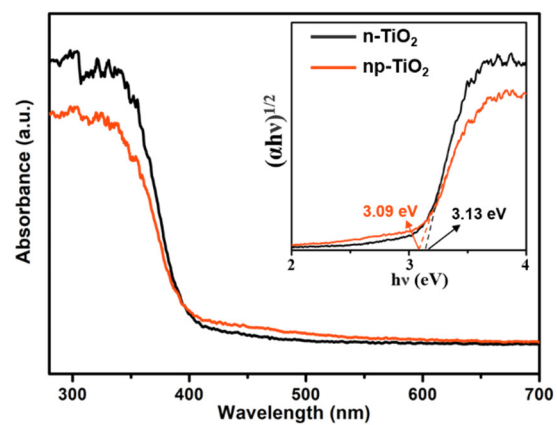

**Figure S12.** UV-vis diffuse reflectance spectra of n-TiO<sub>2</sub> and np-TiO<sub>2</sub>. The inset is curves of Kubelka-Munk function as the vertical axis and plotted against the photon energy.

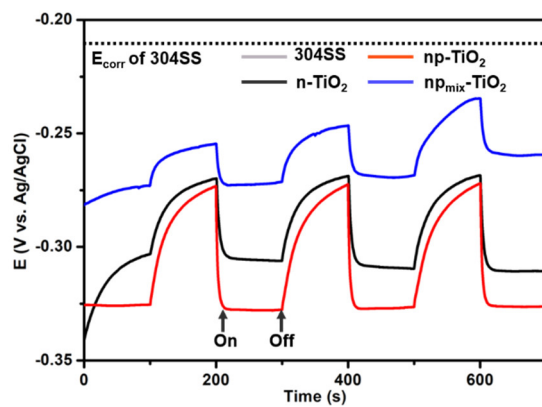

**Figure S13.** OCP variations of 304SS coupled with n-TiO<sub>2</sub>, np-TiO<sub>2</sub>, and np<sub>mix</sub>-TiO<sub>2</sub> electrodes in 3.5 wt% NaCl solution with intermittent illumination.

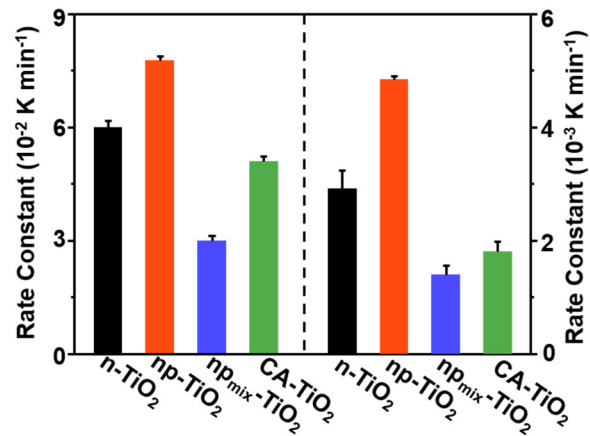

**Figure S14.** Photocatalytic rate constants for degradations of methylene blue (MB) and acetone with different samples under UV-Vis light irradiation.

## Reference

- [1] Y. Lu, Y. X. Liu, L. He, L.-Y. Wang, X. L. Liu, J. W. Liu, Y. Z. Li, G. Tian, H. Zhao, X. H. Yang, J. Liu, C. Janiak, S. Lenaerts, X.-Y. Yang, B.-L. Su, *Nanoscale*, 2020, **12**, 8364-8370
- [2] Y. Bai, Y. E. Zhou, J. Zhang, X. B. Chen, Y. H. Zhang, J. F. Liu, J. Wang, F. F. Wang, C. D. Chen, C. Li, R. G. Li, C. Li, *ACS Catal.* 2019, **9**, 3242-3252.
- [3] Y. L. Sui, S. B. Liu, T. F. Li, Q. X. Liu, T. Jiang, Y. F. Guo, J. L. Luo, *J. Catal.* 2017, **353**, 250-255.
- [4] C. M. Gao, Tao. Wei, Y. Y. Zhang, X. H. Song, Y. Huan, H. Liu, M. W. Zhao, J. H. Yu, X. D. Chen, *Adv. Mater.* 2019, **31**, 1806596.
- [5] A.-Y. Zhang, W. Y. Wang, J.-J. Chen, C. Liu, Q. X. Li, X. Zhang, W. W. Li, Y. Si, H. Q. Yu, *Energy Environ. Sci.* 2018, **11**, 1444-1448.
